# Supplementary material
Source: publisher figshare collection journal article supplement (https://gsajournals.figshare.com/ndownloader/files/18536441)
Supplement: Supplementary file 1 [file 18536441]

## Sheet: Supplemental Table S5
Supplemental Table S5. Variance component estimates from the fitted full mixed linear model used to calculate heritability on a line-mean basis for adult maize leaf cuticular conductance (gc) and flowering time (days to anthesis) in a location (Maricopa, MA; and San Diego, SD) and across all four environments (AllEnv).
	Cuticular conductance (gc)			Flowering time
Sources of variationa	MA	SD	AllEnv	MA	SD	AllEnv
Env	0.0016978	0.000596674	0.00157479	0.286985	31.3271	43.7635
Block(Env)	9.48168e-11	3.69534e-05	1.30921e-05	0.83763	0.893551	1.00741
Column(Env)	2.5207e-10	1.24782e-05	1.04687e-05	0.309796	2.53013e-06	0.133505
Genotype	0.00101418	0.00062438	0.000664751	41.9592	28.4002	34.7135
Genotype×Env	0.000394414	0.000158213	0.000367739	3.66418	3.00092	5.01989
Error	0.00048543	0.000351135	0.00042185	6.76209	4.42802	5.4935
aBlock(Env), block nested within environment; Column(Env), column nested within environment; Env, environment; Genotype, genotype; Genotype×Env, genotype-by-environment interaction; Error, residual variance
